# Supplementary material for: WISExome: a within-sample comparison approach to detect copy number variations in whole exome sequencing data
Source: PubMed Central journal article supplement — Eur J Hum Genet. 2017 Nov 8;25(12):1354–63. doi: 10.1038/s41431-017-0005-2 (PMC5865163; doi:10.1038/s41431-017-0005-2), 2017-11-08
Supplement: 41431_2017_5_MOESM1_ESM.pdf [file 41431_2017_5_MOESM1_ESM.pdf]

Supplementary Data for manuscript:

WISExome: A within-sample comparison approach to detect copy number variations in whole exome sequencing data.

Roy Straver<sup>1</sup>, Marjan M. Weiss<sup>1</sup>, Quinten Waisfisz<sup>1</sup>, Erik A. Sistermans<sup>1,\*</sup> and Marcel J.T. Reinders<sup>1,2,\*</sup>

| ID  |        | Array |           |           | WISExome |           |           | XHMM  |           |           | CoNIFER |           |           | CODEX |           |           | CLAMMS |           |           |       |
|-----|--------|-------|-----------|-----------|----------|-----------|-----------|-------|-----------|-----------|---------|-----------|-----------|-------|-----------|-----------|--------|-----------|-----------|-------|
| CNV | Sample | Chr   | Start     | Stop      | Amp/Del  | Start     | Stop      | Calls | Start     | Stop      | Calls   | Start     | Stop      | Calls | Start     | Stop      | Calls  | Start     | Stop      | Calls |
| 1   | A      | 15    | 23605900  | 28771100  | Del      | 23608251  | 28595888  | 1     | 23609709  | 28566641  | 49      | 23608042  | 25420097  | 1     | 23577463  | 28632880  | 4      | 23631315  | 28525469  | 1     |
| 2   | B      | 9     | 214187    | 4566187   | Amp      | 64174     | 4576676   | 1     | 271660    | 4564531   | 43      | 35404     | 4583226   | 1     | 154537    | 4585524   | 2      | 214478    | 4585524   | 1     |
| 3   | B      | 7     | 100000    | 2818074   | Del      | 193521    | 2831309   | 1     | 288235    | 2802433   | 48      | -         | -         | 0     | 20781     | 2802433   | 4      | 195510    | 2802536   | 1     |
| 4   | C      | 15    | 31073761  | 32915593  | Del      | 30902878  | 32446230  | 1     | 31114786  | 32404147  | 12      | -         | -         | 0     | 30875082  | 32691203  | 2      | 31085444  | 32404585  | 1     |
| 5   | D      | 8     | 8774423   | 10475458  | Amp      | 8750463   | 10411575  | 1     | 8877786   | 10396230  | 12      | -         | -         | 0     | 8750463   | 10411575  | 1      | 8865536   | 10411575  | 1     |
| 6   | E      | X     | 6448777   | 8134649   | Amp      | 6451945   | 8095152   | 1     | 6451946   | 8095152   | 5       | -         | -         | 0     | 6968286   | 8095152   | 1      | 6968286   | 7894192   | 1     |
| 7   | F      | 20    | 540200    | 2208991   | Del      | 590255    | 2129263   | 1     | 642660    | 2129263   | 17      | -         | -         | 0     | 585164    | 2129263   | 1      | 585164    | 2129263   | 1     |
| 8   | G      | 22    | 20723711  | 21951312  | Amp      | 20715521  | 21663254  | 2     | 20724361  | 21424388  | 22      | -         | -         | 0     | 20705764  | 21537878  | 2      | 20754816  | 21424388  | 1     |
| 9   | H      | 6     | 145551394 | 146283017 | Amp      | 145669988 | 146276201 | 1     | 145956422 | 146276015 | 15      | 145172405 | 146350806 | 1     | 145669728 | 146276201 | 1      | 145669728 | 146276201 | 1     |
| 10  | I      | 7     | 6010735   | 6361936   | Amp      | 6022386   | 6414453   | 1     | 6026362   | 6217654   | 8       | -         | -         | 0     | 6017156   | 6230177   | 1      | 6026438   | 6230177   | 1     |
| 11  | J      | 1     | 235422065 | 235716261 | Amp      | 235423872 | 235658195 | 1     | 235490245 | 235643528 | 11      | -         | -         | 0     | 235423872 | 235658195 | 1      | 235423872 | 235658195 | 1     |
| 12  | K      | 21    | 27252861  | 27543138  | Amp      | 27253167  | 27840939  | 1     | 27253168  | 27512571  | 6       | -         | -         | 0     | 27253167  | 27512571  | 1      | 27253167  | 27512571  | 1     |
| 13  | L      | 16    | 28732295  | 28952277  | Del      | 28769968  | 29062277  | 1     | -         | -         | 0       | -         | -         | 0     | 28734541  | 29050078  | 1      | 28836587  | 29001379  | 1     |
| 14  | J      | 1     | 237807486 | 238000883 | Amp      | 237811669 | 237997180 | 1     | 237811670 | 237996523 | 11      | 237806576 | 238037501 | 1     | 237811669 | 237997180 | 1      | 237811669 | 237997180 | 1     |
| 15  | M      | 3     | 2818074   | 2980918   | Del      | 2777518   | 2967517   | 1     | -         | -         | 0       | -         | -         | 0     | 2777518   | 2967517   | 1      | 2777679   | 2967517   | 1     |
| 16  | N      | 9     | 107459905 | 107545550 | Del      | 107456603 | 107558300 | 1     | 107528604 | 107543399 | 2       | -         | -         | 0     | 107456603 | 107558300 | 1      | 107456603 | 107556798 | 1     |
| 17  | I      | 16    | 89813821  | 89864352  | Del      | 89813160  | 89862474  | 1     | 89842085  | 89842279  | 1       | -         | -         | 0     | 89813160  | 89862474  | 1      | 89813160  | 89862474  | 1     |
| 18  | O      | 5     | 140222138 | 140238656 | Del      | 140222881 | 140238082 | 1     | 140222088 | 140238082 | 5       | 140221670 | 140242395 | 1     | 140230761 | 140238082 | 1      | -         | -         | 0     |
| 19  | P      | X     | 153058879 | 153068482 | Del      | 153059628 | 153074113 | 1     | -         | -         | 0       | -         | -         | 0     | 153059944 | 153074113 | 1      | 153059944 | 153074113 | 1     |
| 20  | Q      | 5     | 7867073   | 7871862   | Del      | 7866980   | 7871059   | 1     | 7869175   | 7871059   | 1       | -         | -         | 0     | 7867119   | 7871059   | 1      | 7867119   | 7871059   | 1     |

**Table S1:** Overview of all known pathogenic CNVs in 17 test samples. The first two columns indicate CNV index and sample identifier. The array based information is shown in the next four columns, showing the chromosome (Chr), start and stop positions (based on Hg19), and whether the call was an amplification or a deletion (Amp/Del). Next, for every tool the start and end positions for calls overlapping the array calls are shown, as well as the number of calls that overlapped. Whenever multiple calls were made, the reported start position is the first base pair position of the first call with overlap, the stop position is the last base pair of the last call overlapping the array CNV, and the number of overlapping calls is shown in the corresponding Calls column.

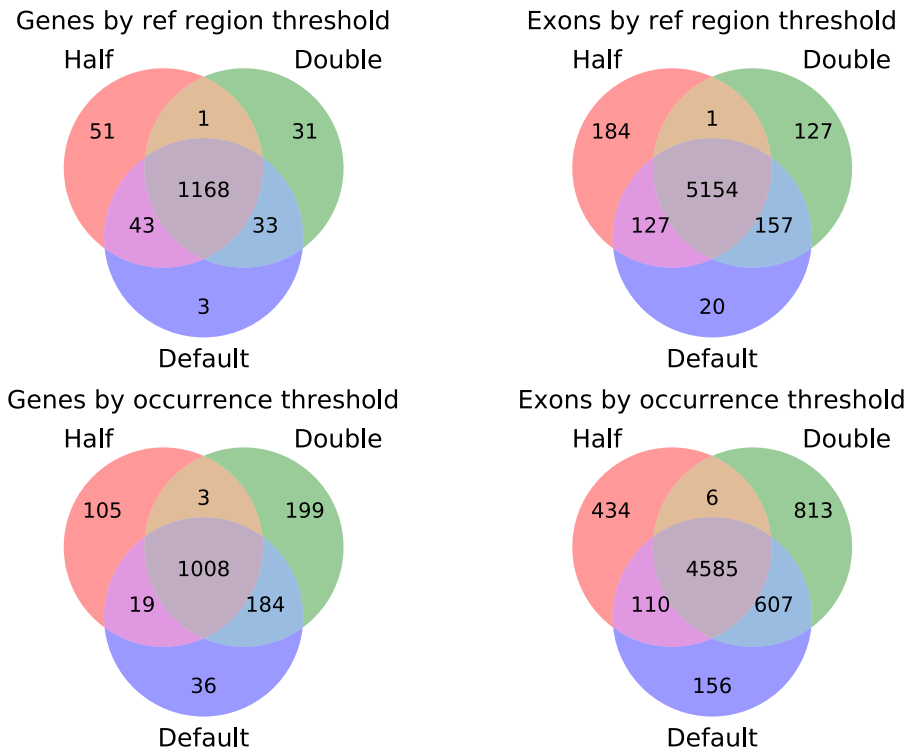

**Figure S1:** Venn diagram of overlapping genes (left) and exons (right) when running WISExome with three settings of pre-filtering of target regions. WISExome's default setting is: pruning target regions with less than 10 reference target regions, as well as target regions that are called in more 4 training samples. Top row shows two different settings for the number of reference targets: (1) HALF: prune target regions with less than 5 reference target regions, and (2) DOUBLE: prune regions with less than 20 reference target regions. The bottom row shows two different settings for the number of calls in the training set: (1) HALF: prune target regions that occur more than 2 times in the training set, (2) DOUBLE: prune regions that occur more than 8 times in the training set.

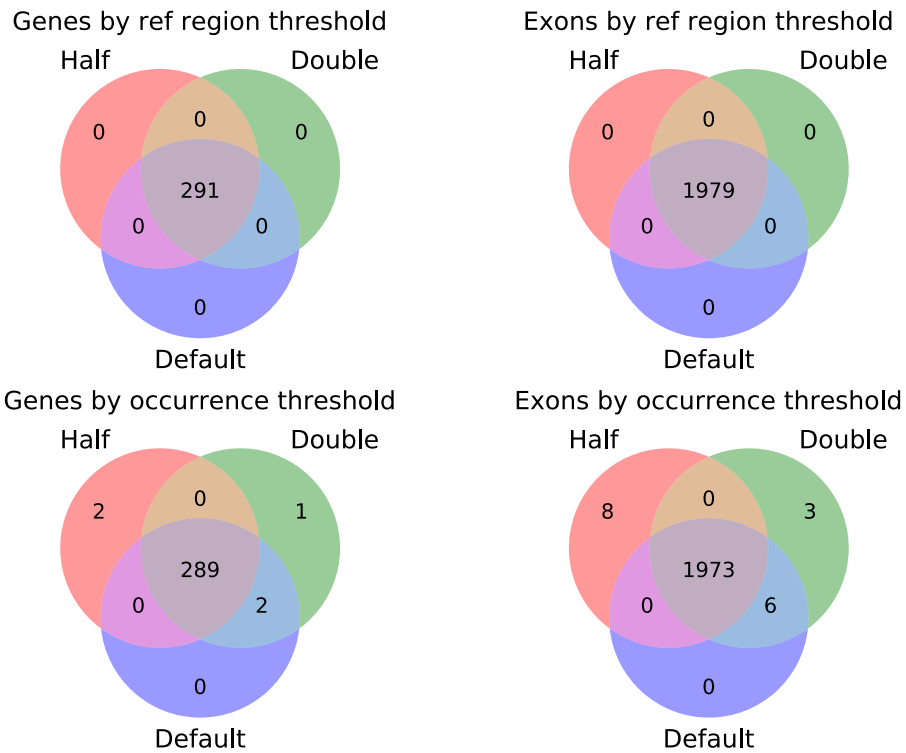

**Figure S2:** Similar to Figure S1, showing the effect of two of the pre-filtering thresholds. Here, the calls of WISExome for all the different settings are first filtered to require overlap with the regions detected by the array analysis. This way we can inspect how the different filter settings influence results that overlap with the array analysis.

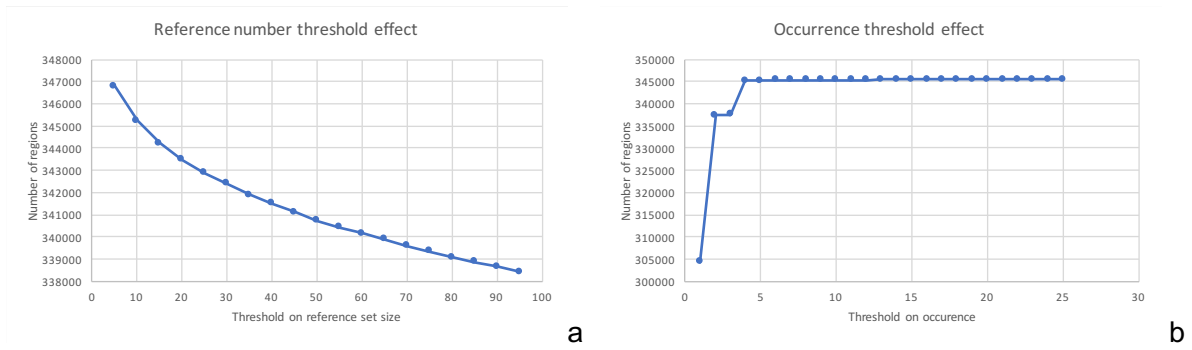

**Figure S3:** Effect of thresholds on the minimum number of reference target regions (a) and the maximal number of calls within the training set (b) on the number of reliable target regions (vertical axis).

Tool comparison for CNV: 1, Sample: A, Type: Deletion

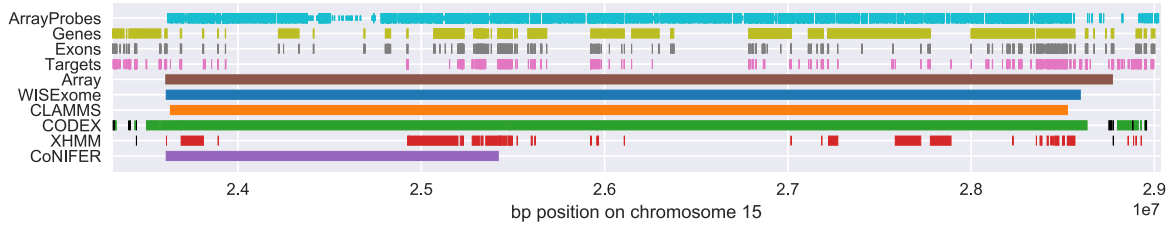

Tool comparison for CNV: 2, Sample: B, Type: Amplification

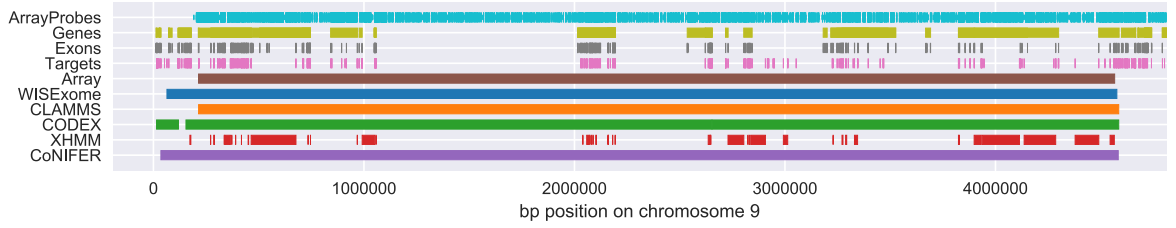

Tool comparison for CNV: 3, Sample: B, Type: Deletion

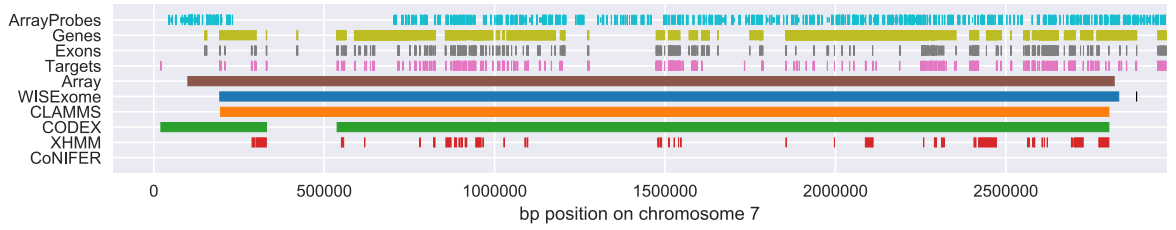

Tool comparison for CNV: 4, Sample: C, Type: Deletion

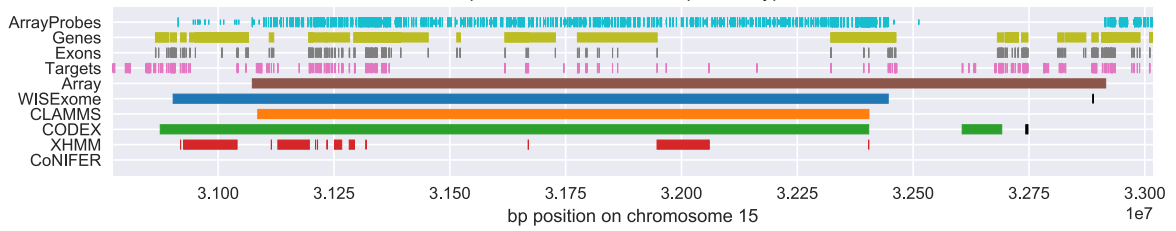

Tool comparison for CNV: 5, Sample: D, Type: Amplification

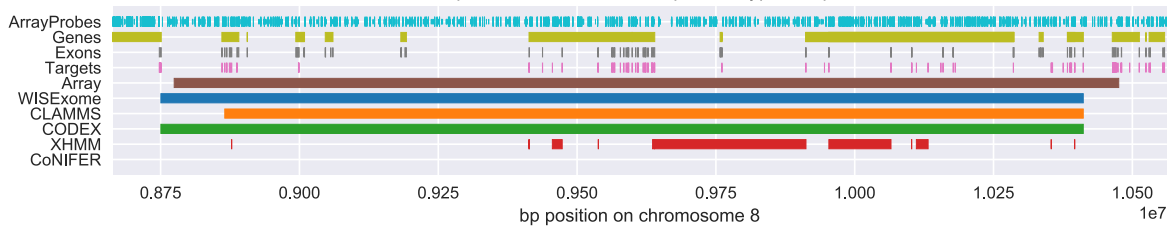

Tool comparison for CNV: 6, Sample: E, Type: Amplification

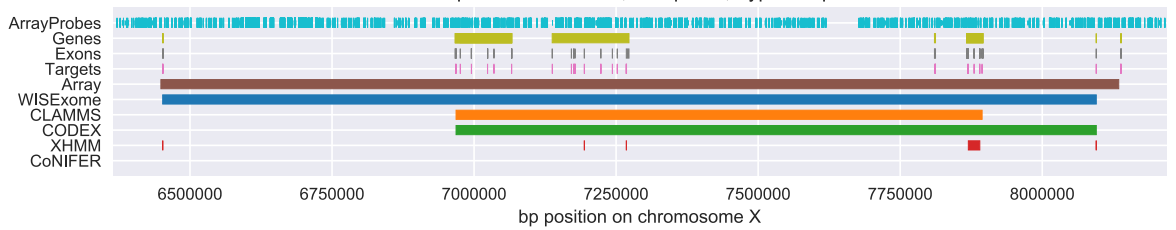

Tool comparison for CNV: 7, Sample: F, Type: Deletion

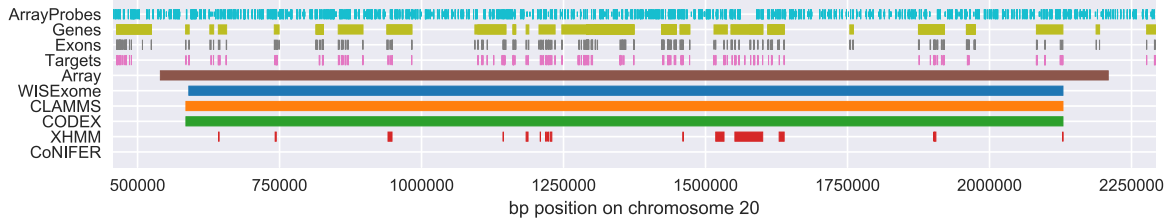

Tool comparison for CNV: 8, Sample: G, Type: Amplification

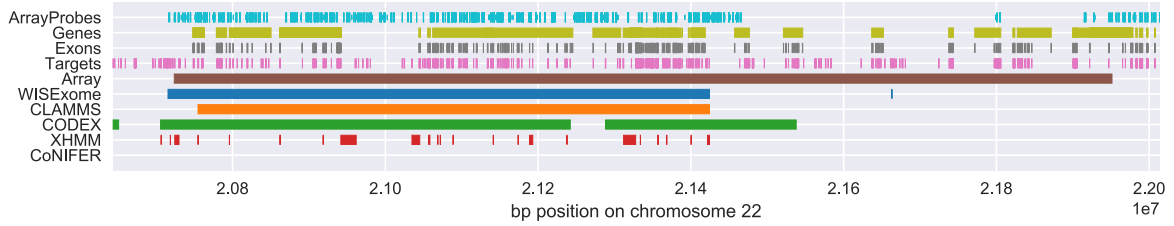

Tool comparison for CNV: 9, Sample: H, Type: Amplification

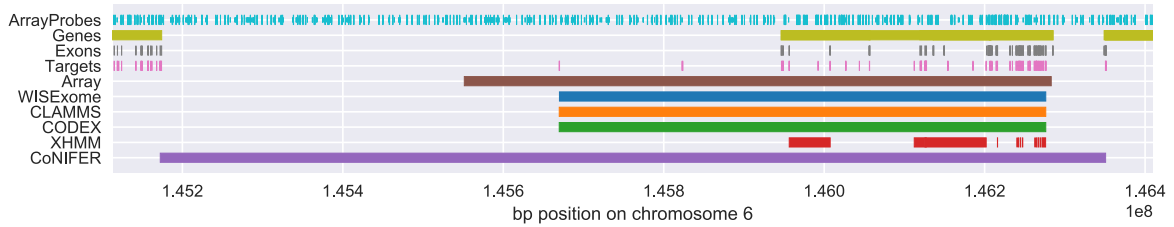

Tool comparison for CNV: 10, Sample: I, Type: Amplification

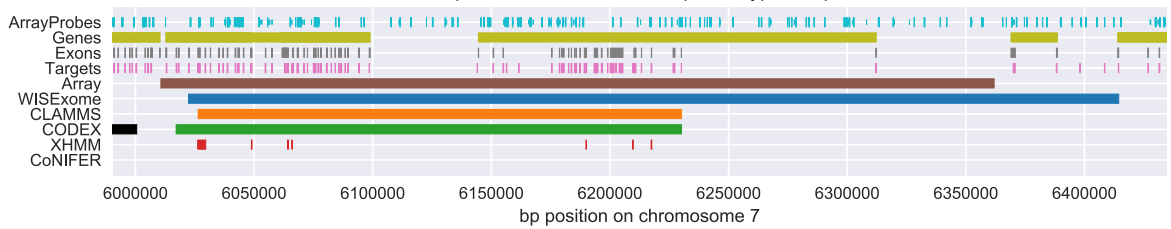

Tool comparison for CNV: 11, Sample: J, Type: Amplification

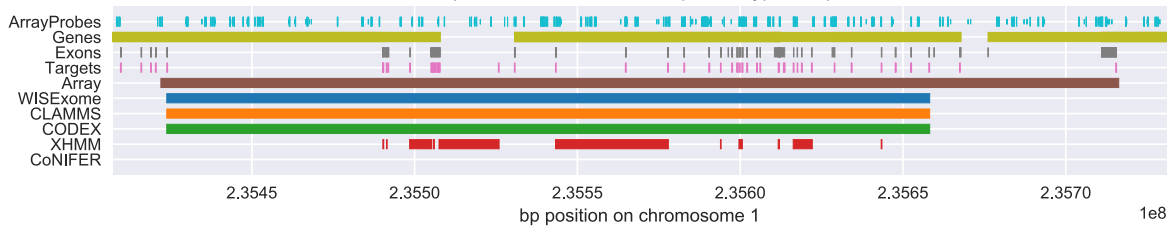

Tool comparison for CNV: 12, Sample: K, Type: Amplification

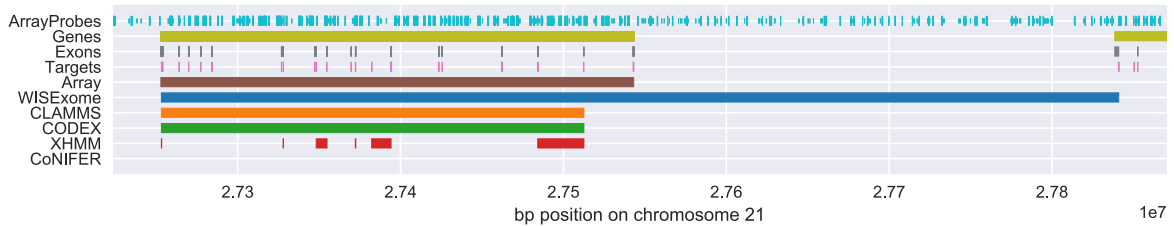

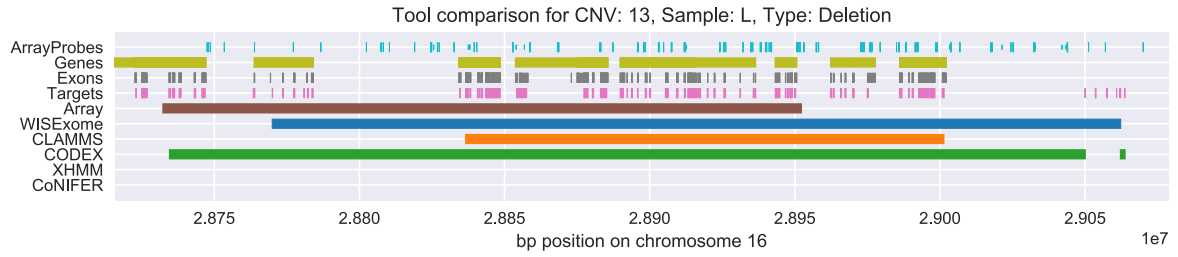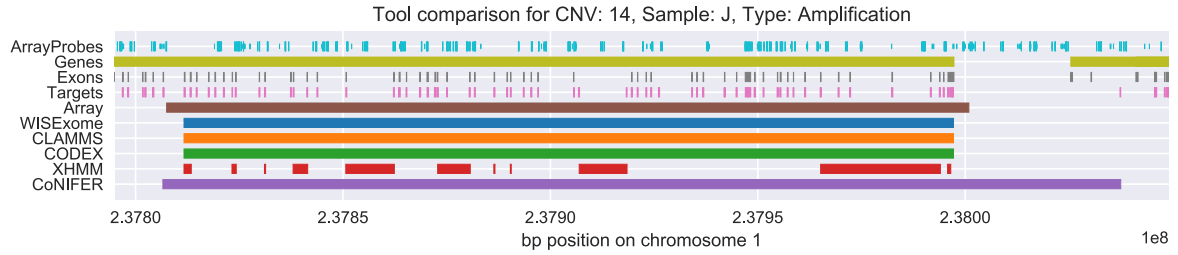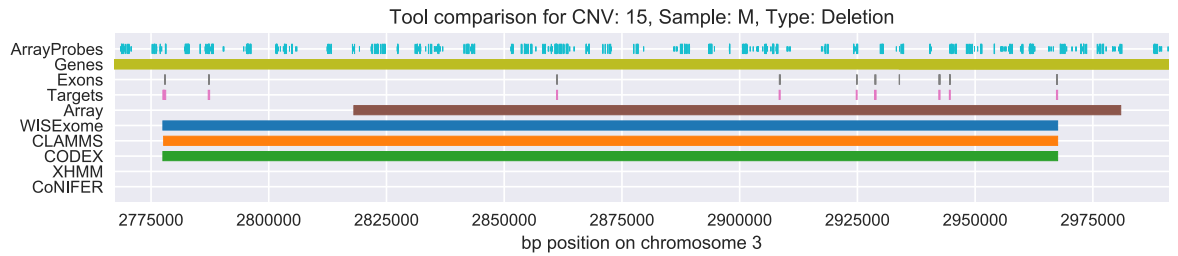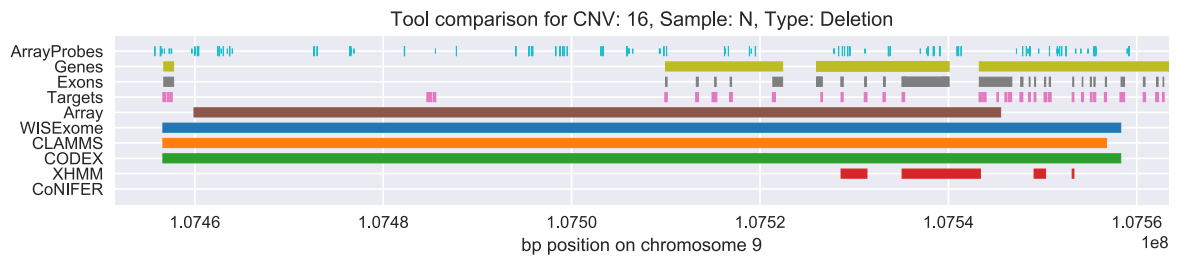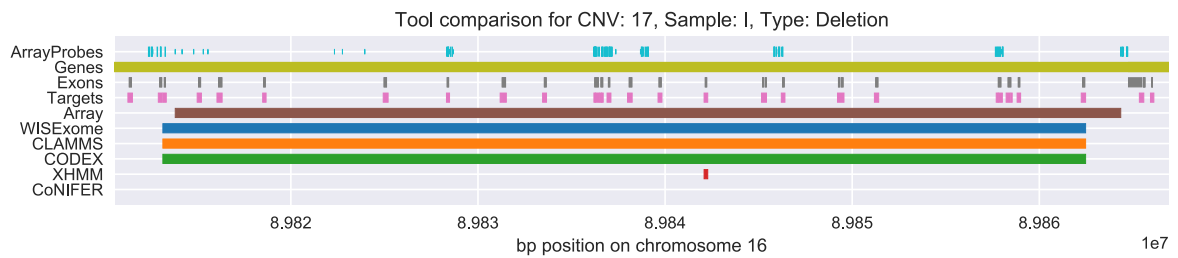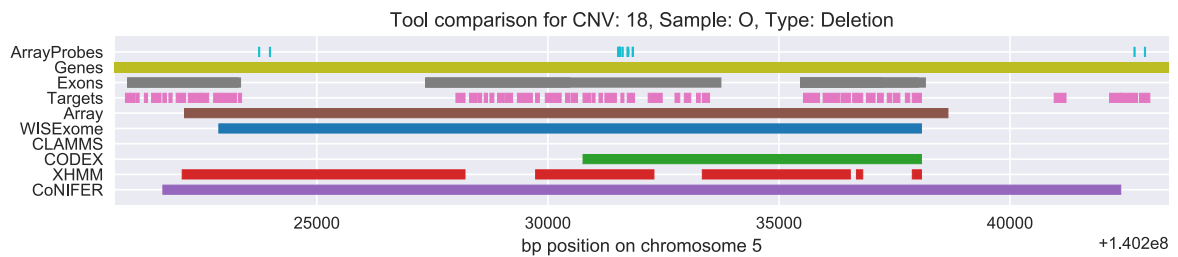



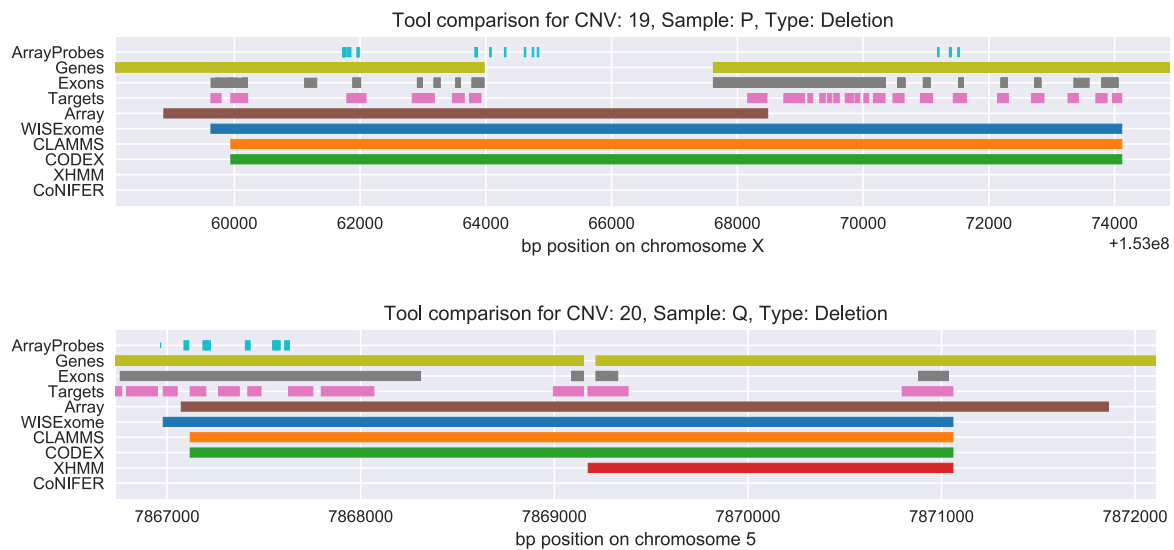

**Figure S4:** Detected CNV segments for all tools for all CNVs reported by clinical geneticist using array analysis. CNV numbers and sample identifiers match those in Supplementary Table S1. The region is annotated by the array probes (cyan), genes (citron), exons (grey) and target regions (pink).

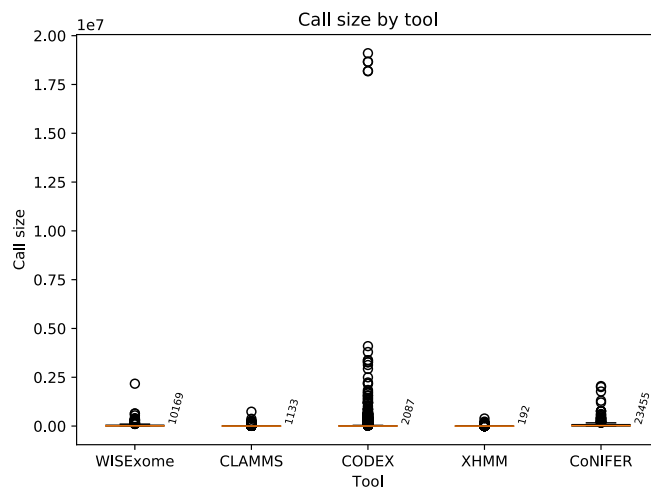

**Figure S5:** The same boxplot as shown in Figure 3a in the manuscript, except no cropping was performed. Numbers inside the figure annotate the actual median for every tool.

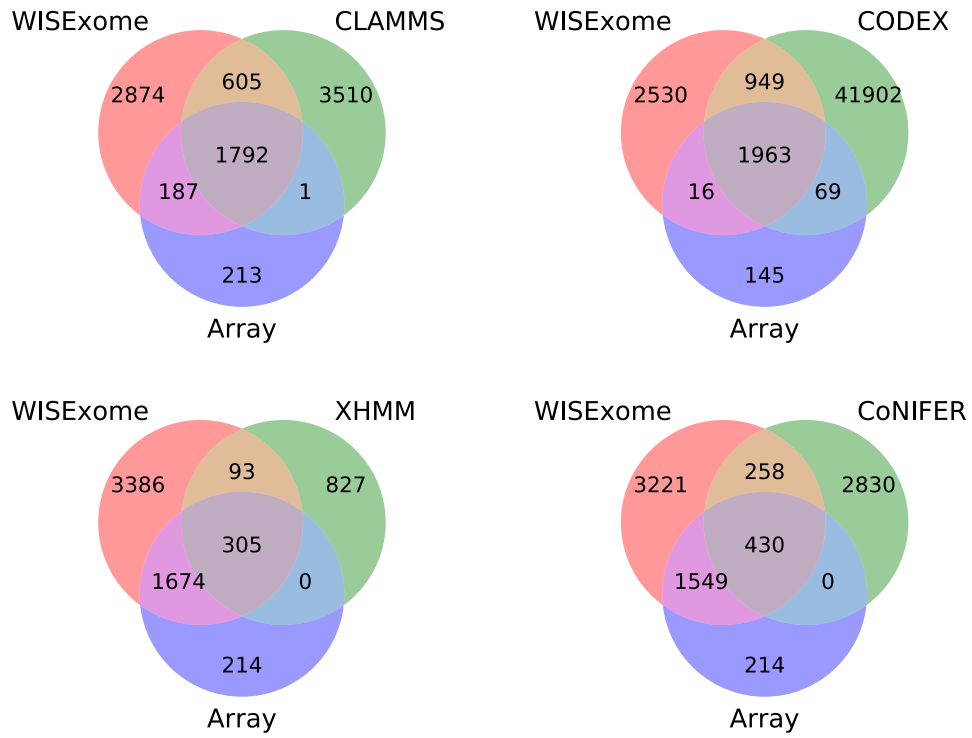

**Figure S6:** Overlap of exons affected by calls by WISExome, array analysis and (a) CLAMMS, (b) CODEX, (c) XHMM, and (d) CoNIFER.

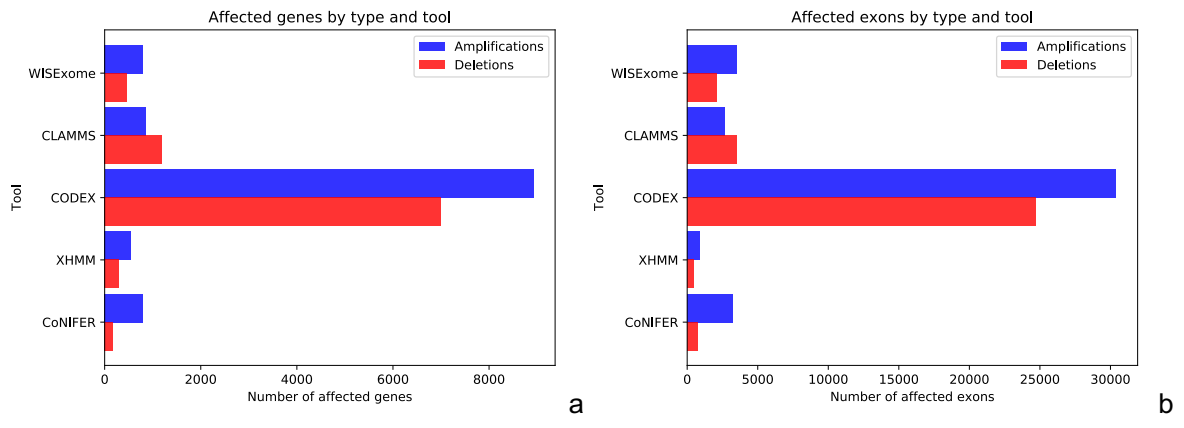

**Figure S7:** Number of genes and exons affected by amplifications and deletions per tool after thresholding. (a) Number of genes affected by calls per tool. (b) Number of exons affected by calls per tool.

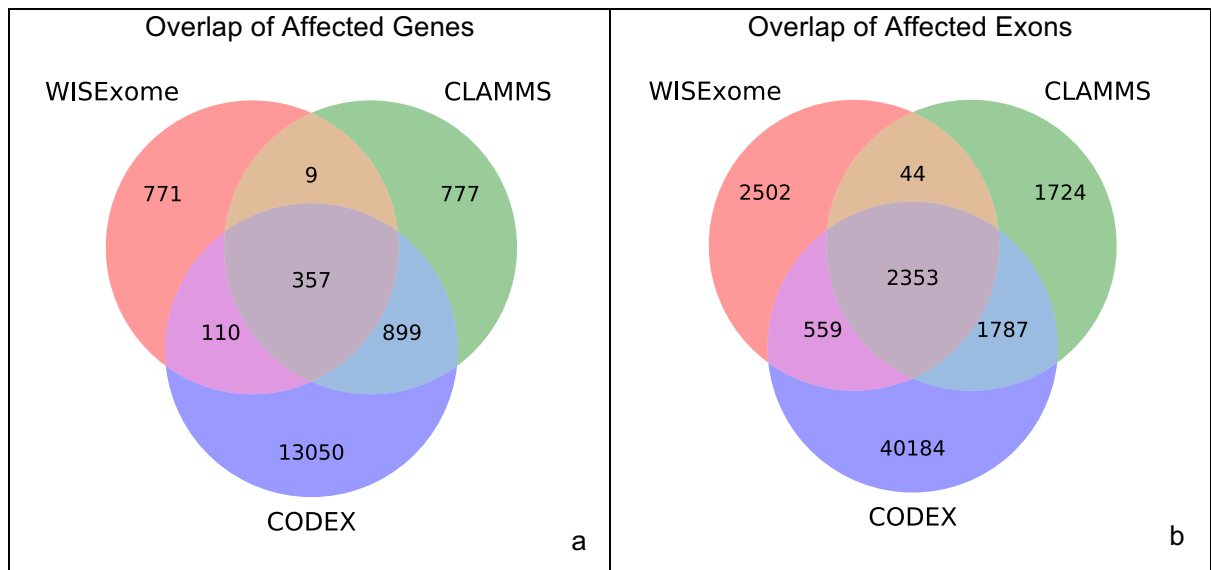

**Figure S8:** Overlap of (a) genes and (b) exons affected by calls by WISExome, CLAMMS and CODEX.

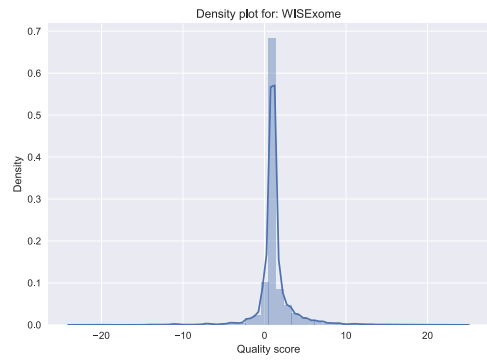

a

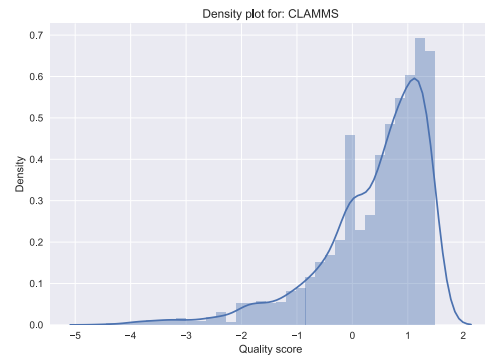

b

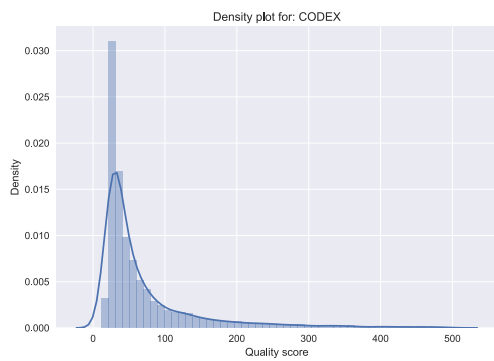

c

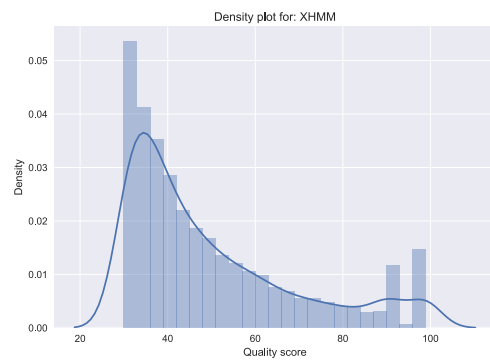

d

**Figure S9:** Density plots for the quality scores that are generated by the different CNV detection tools for the calls that they generate. CoNIFER is excluded as it does not provide a quality score per region. (a) WISExome's, (b) CLAMMS's, (c) CODEX's and (d) XHMM's quality score distributions. Every distribution is fitted with a kernel density estimate.

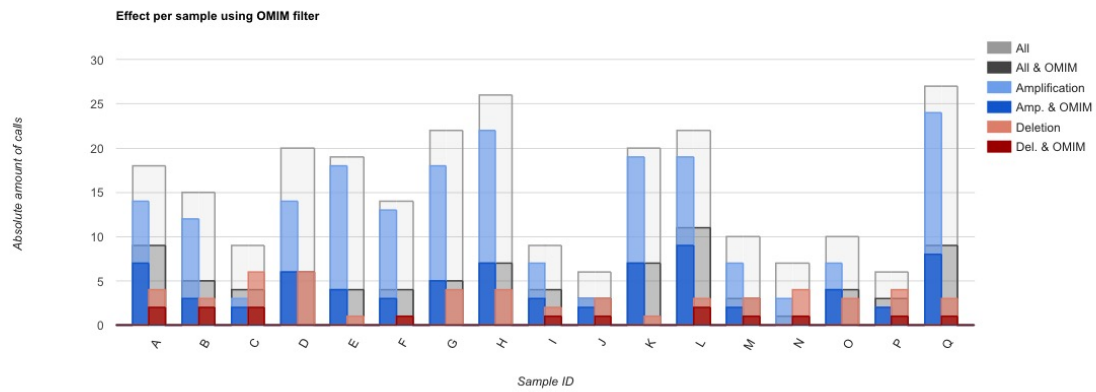

**Figure S10:** Effect on number of calls per sample when filtering on WISExome's quality score and OMIM phenotype key  $\geq 3$ . Data is shown for all calls (gray), and for amplifications (blue) and deletions (red) separately. Light colors show the effect of applying only the quality filter, darker colors show the amounts of calls when overlap with at least one gene with an OMIM phenotype key of  $\geq 3$  is also required.

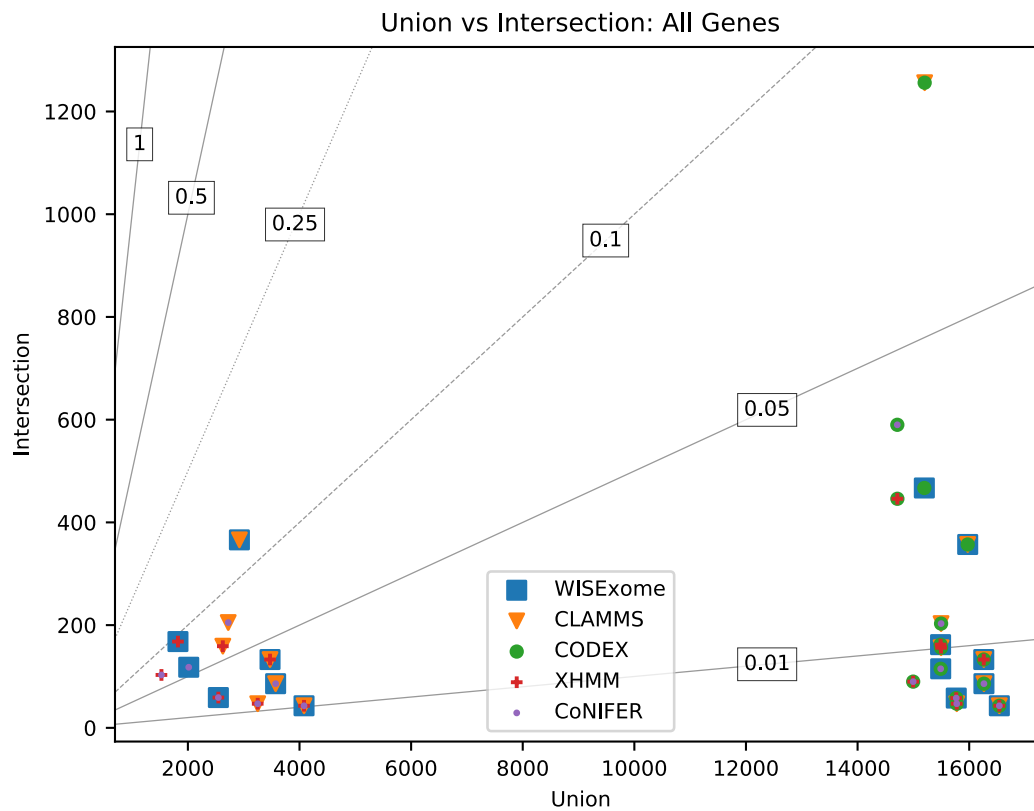

**Figure S11:** Plot showing the overlap in detected genes between any combination of tools. The figure is the equivalent of Figure 4b where overlap in exons is shown instead. For a detailed description of the figure we therefore refer to Figure 4b.



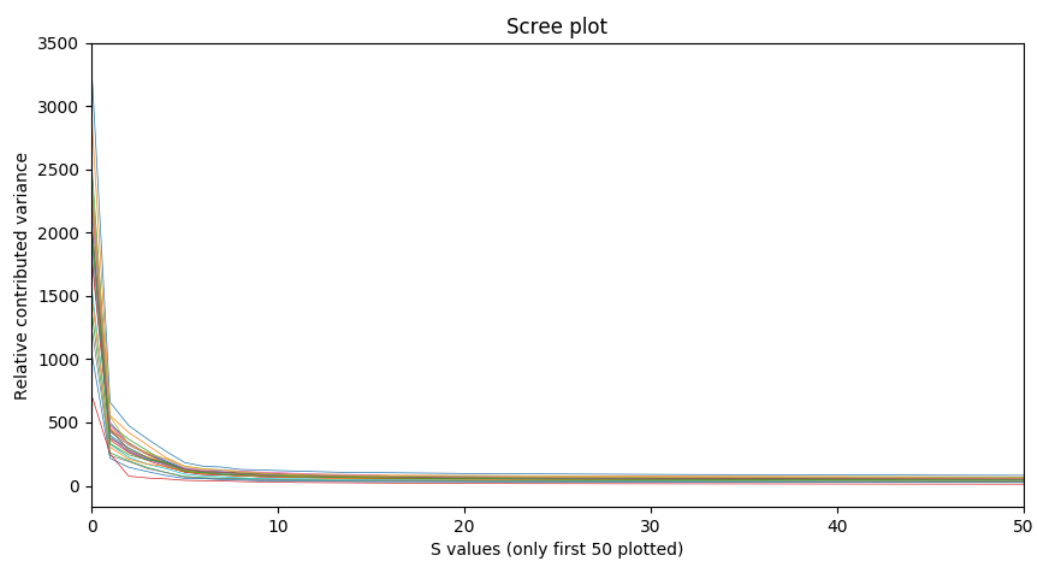

**Figure S12:** The scree plot used to determine the value of the SVD variable for CoNIFER.

## SM1. Corrected significance threshold

Here we derive the used thresholds for significance.

First, we applied FWER using these settings:

|          |        |                        |
|----------|--------|------------------------|
| $\alpha$ | 0.05   | Significance threshold |
| $N$      | 366795 | Number of targets      |
| $w$      | 8      | Number of windows      |

Multiplying the probe count by the number of windows tested we obtained the total number of tests ( $T$ ) done:

$$T = N \cdot w \quad (\text{S1})$$

We determined the p-value required for this number of tests:

$$\frac{1}{T} \cdot \alpha \quad (\text{S2})$$

Which equals to:

$$\frac{\alpha}{N \cdot w} \quad (\text{S3})$$

Using the numbers for our settings we obtain:

$$\frac{0.05}{366795 \cdot 8} = 1.7e - 8 \quad (\text{S4})$$

Looking up the corresponding z-score for a two-tailed p-value of 1.7e-8 we found a corresponding z-score threshold of 5.64

## SM2. Student's t-test with a pooled variance

This part is meant to explain the mathematical background to the segmentation algorithm we applied to fine-tune the borders of detected aberrations.

For this we use the following variables:

|         |                                                              |
|---------|--------------------------------------------------------------|
| $X1$    | samples on the segmented region (considered to be aberrated) |
| $X2$    | samples outside the segmented region (not aberrated)         |
| $m_1$   | mean of samples of $X1$                                      |
| $s_1^2$ | variance of samples of $X1$                                  |
| $m_2$   | mean of samples of $X2$                                      |
| $s_2^2$ | variance of samples of $X2$                                  |

We use the following formula for a t-test with unequal sample sizes and equal variance:

$$t - test = \frac{(m_1 - m_2)}{s_p} \quad (S5)$$

where:

$$s_p = \sqrt{\frac{(n_1 - 1)s_1^2 + (n_2 - 1)s_2^2}{n_1 + n_2 - 1}} \quad (S6)$$

For  $X2$  we sample values from the whole chromosome except for the candidate aberrated regions. Consequently,  $n_2$  is very large in comparison to  $n_1$ . This provides the rule:

$$n_2 \gg n_1 > 1 \quad (S7)$$

with this rule, we can approximate the  $\sqrt{\phantom{x}}$  term in the denominator of the t-test (equation S1), i.e.

$$(S8)$$

Now the t-test can be rewritten to:

$$t - test = \frac{\sqrt{n_1}}{s_p(m_1 - m_2)} \quad (S9)$$

Rewriting  $s_p$ :

$$s_p = \sqrt{\frac{(n_1 - 1)}{n_1 + n_2 - 1} s_1^2 + \frac{(n_2 - 1)}{n_1 + n_2 - 1} s_2^2} \quad (S10)$$

Again, using the rule stated in equation (S7),  $n_2 \gg n_1$ ,  $n_2 \gg 1$ , this can be approximated as follows:

$$s_p = \sqrt{\frac{(n_1 - 1)}{n_2} s_1^2 + \frac{(n_2 - 1)}{n_2} s_2^2} \quad (S11)$$

Using that  $n_2 \gg 1$ , the first term disappears. The ratio in the second term equals 1. From that it follows that the pooled variance becomes:

$$s_p = s_2 \quad (S12)$$

Since the non aberrated region on the chromosome is very large  $s_2$  will be nearly constant when the segment ( $X_1$ ) changes size. Therefore, when maximizing the t-test  $s_p$  can be considered constant:

$$t^* = \frac{\sqrt{n_1}}{s_p}(m_1 - m_2) \rightarrow \sqrt{n_1}(m_1 - m_2) \quad (\text{S13})$$

Our implementation maximizes the difference between the mean of the segment and all other, not aberrated, target regions on the same chromosome, multiplied by the square root of the length of the segment.

From the deduction shown here, it follows our segmentation equals optimization between two sets using the t-test.

### **SM3. Settings used for other tools**

**XHMM:** Samples supplied to XHMM (downloaded from GitHub @ 18 June 2015) were the same BAM files as prepared for WISExome testing. XHMM was run according to the tutorial. The quality filter was set to `Q_SOME >= 60`, as was suggested in the tutorials. XHMM counts the read coverage per exon and employs Principal Component Analysis (PCA) to remove most of the technical variations over a set of samples. XHMM takes several heuristics into account such as exome-wide CNV rates, length distributions and the distance between target regions, all of these were set to default values. XHMM could not distinguish between training and test samples, thus allowing test samples to influence their own results and other samples through both the PCA and sample comparisons.

**CoNIFER:** CoNIFER (version 0.2.2; Released 9/17/2012) was provided all samples involved in this project. Settings were kept at defaults, with the `--svd` variable set to 4. Seeing the results were missing many of the known positives, we also tried running with SVD values of 2 up to and including 6 to ensure we did not misinterpret the scree plot (Supplementary Figure S12), but these alternative settings did not change the results significantly. Just like XHMM, CoNIFER could not distinguish between training and test samples, thus allowing test samples to influence their own results and other samples through both the SVD and sample comparisons.

**CODEX:** Codex (GitHub, commit 3d40ac9 @ April 7 2017) was run according to the vignette and tutorials supplied. As we have a clear group of affected individuals and controls, we used the `normalize2` function which allowed us to specify the healthy control group. CODEX appears to make many calls allowing the end user to set a threshold. As their paper states, CODEX found significantly more calls than XHMM (2-fold) and CoNIFER (10-fold) in their tests, our finding appears in line with the original authors statements. As we were unable to find a suggestion for this threshold in the manual and tutorials, we decided not to apply one to influence the results as little as possible.

**CLAMMS:** We ran CLAMMS (GitHub, commit 3e19892 @ April 10 2017) with all default settings and suggested values. Based on the readme, we applied  $Q\_EXACT \geq 0$  as a threshold. Results shown here were created using all reference data as reference set. We did not manually pick a reference set per sample (as suggested in the readme), as this would make results too dependent on user interaction. We tried the automated k-tree that was also described, but using the settings shown in the examples results became far worse, likely due to using a too small reference set per test sample.

For tools that provided a scoring per region, we plotted a distribution of these values in Supplementary Figure S9.
